# Supplementary material
Source: PubMed Central journal article supplement (PMC2943260)
Supplement: supp_M110.116319_jbc.M110.116319-2.pdf [file supp_M110.116319_jbc.M110.116319-2.pdf]

### **Supplementary Figure 1.**

Expression of *ChM-I*, *YY1*, *p300*, and *Sp3* in mesenchymal tissues. RNA was extracted directly from each tissue, and cDNA synthesized from the RNA was used for RT-PCR.

### **Supplementary Figure2.**

(A): EMSA for p300 and Sp3. Nuclear extracts were incubated with radiolabeled 43bp double-stranded DNA corresponding to the region from -86 to -44 (GR4), which contains a p300-responsive element and an Sp3-binding motif. A shifted band (indicated by an arrow) was detected in the OND-protein complex from ANOS, which disappeared when excess unlabeled GR4 (lane 2: X 2, lane 3: X 4, lane 4: X 8) was added (left panel). The shifted band was not detected in the OND-protein complex from Saos2 or TAKAO (middle panel). The shifted band disappeared when the OND-protein complex from ANOS was pre-incubated with anti-p300 antibody, and supershifted with anti-Sp3 antibody (white arrow) (right panel).

(B): EMSA for YY1. Nuclear extracts were mixed with radiolabeled 25bp double-stranded DNA corresponding to the region from -357 to -337 (GR3), which contains an YY1 binding motif. A shifted band (indicated by an arrow) was detected in the OND-protein complex from Saos2, which was disappeared when unlabeled GR3 (lane 2: X2, lane 3: X4, lane 4: X8) was added (left panel). A shifted band was detected also in the OND-protein complex from TAKAO, but not from ANOS or hPCs (middle panel). The shifted band was super-shifted (white arrow) when the OND-protein complex from Saos2 was pre-incubated with anti-YY1 antibody (right panel).
