# Supplementary material
Source: PubMed Central journal article supplement (PMC2943260)

Supplementary figure 2

A

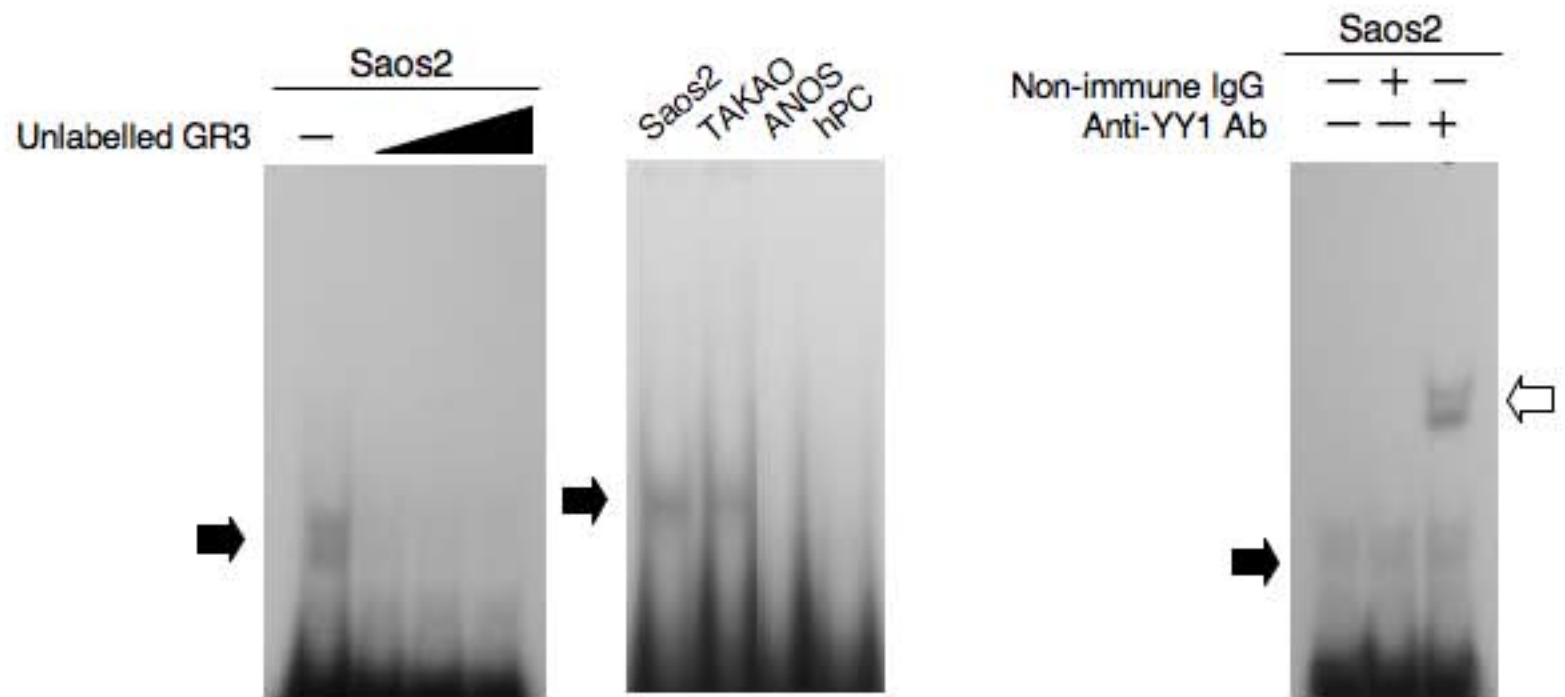

B

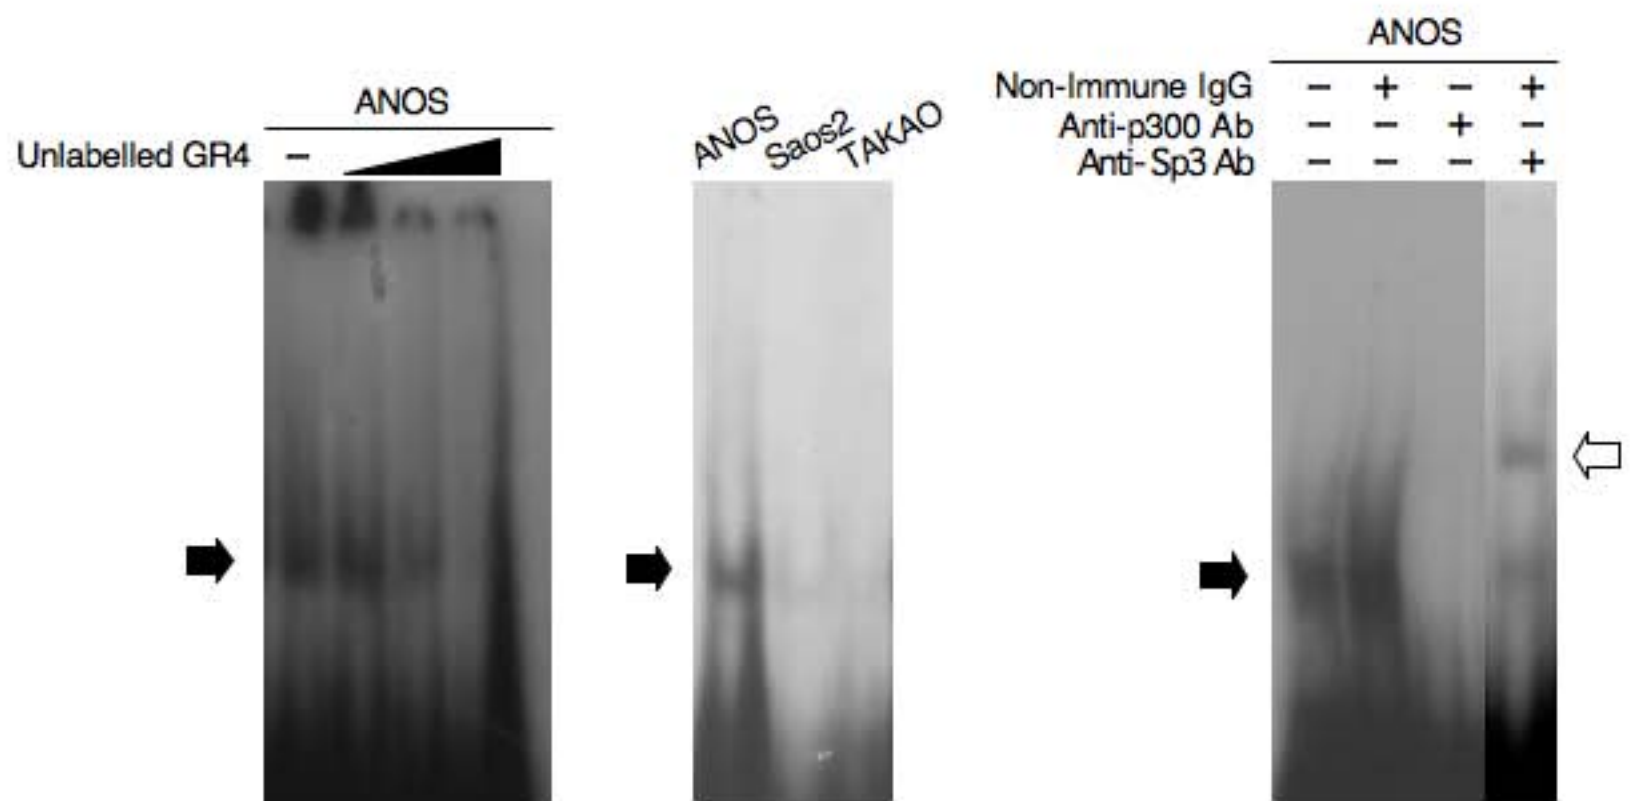

Supplement: supp_M110.116319_jbc.M110.116319-1.pdf [file supp_M110.116319_jbc.M110.116319-1.pdf]
